# Supplementary material
Source: PubMed Central journal article supplement (PMC6357902)
Supplement: jjy147_suppl_supplementary_figures.pdf [file jjy147_suppl_supplementary_figures.pdf]

Supplementary Figure 1

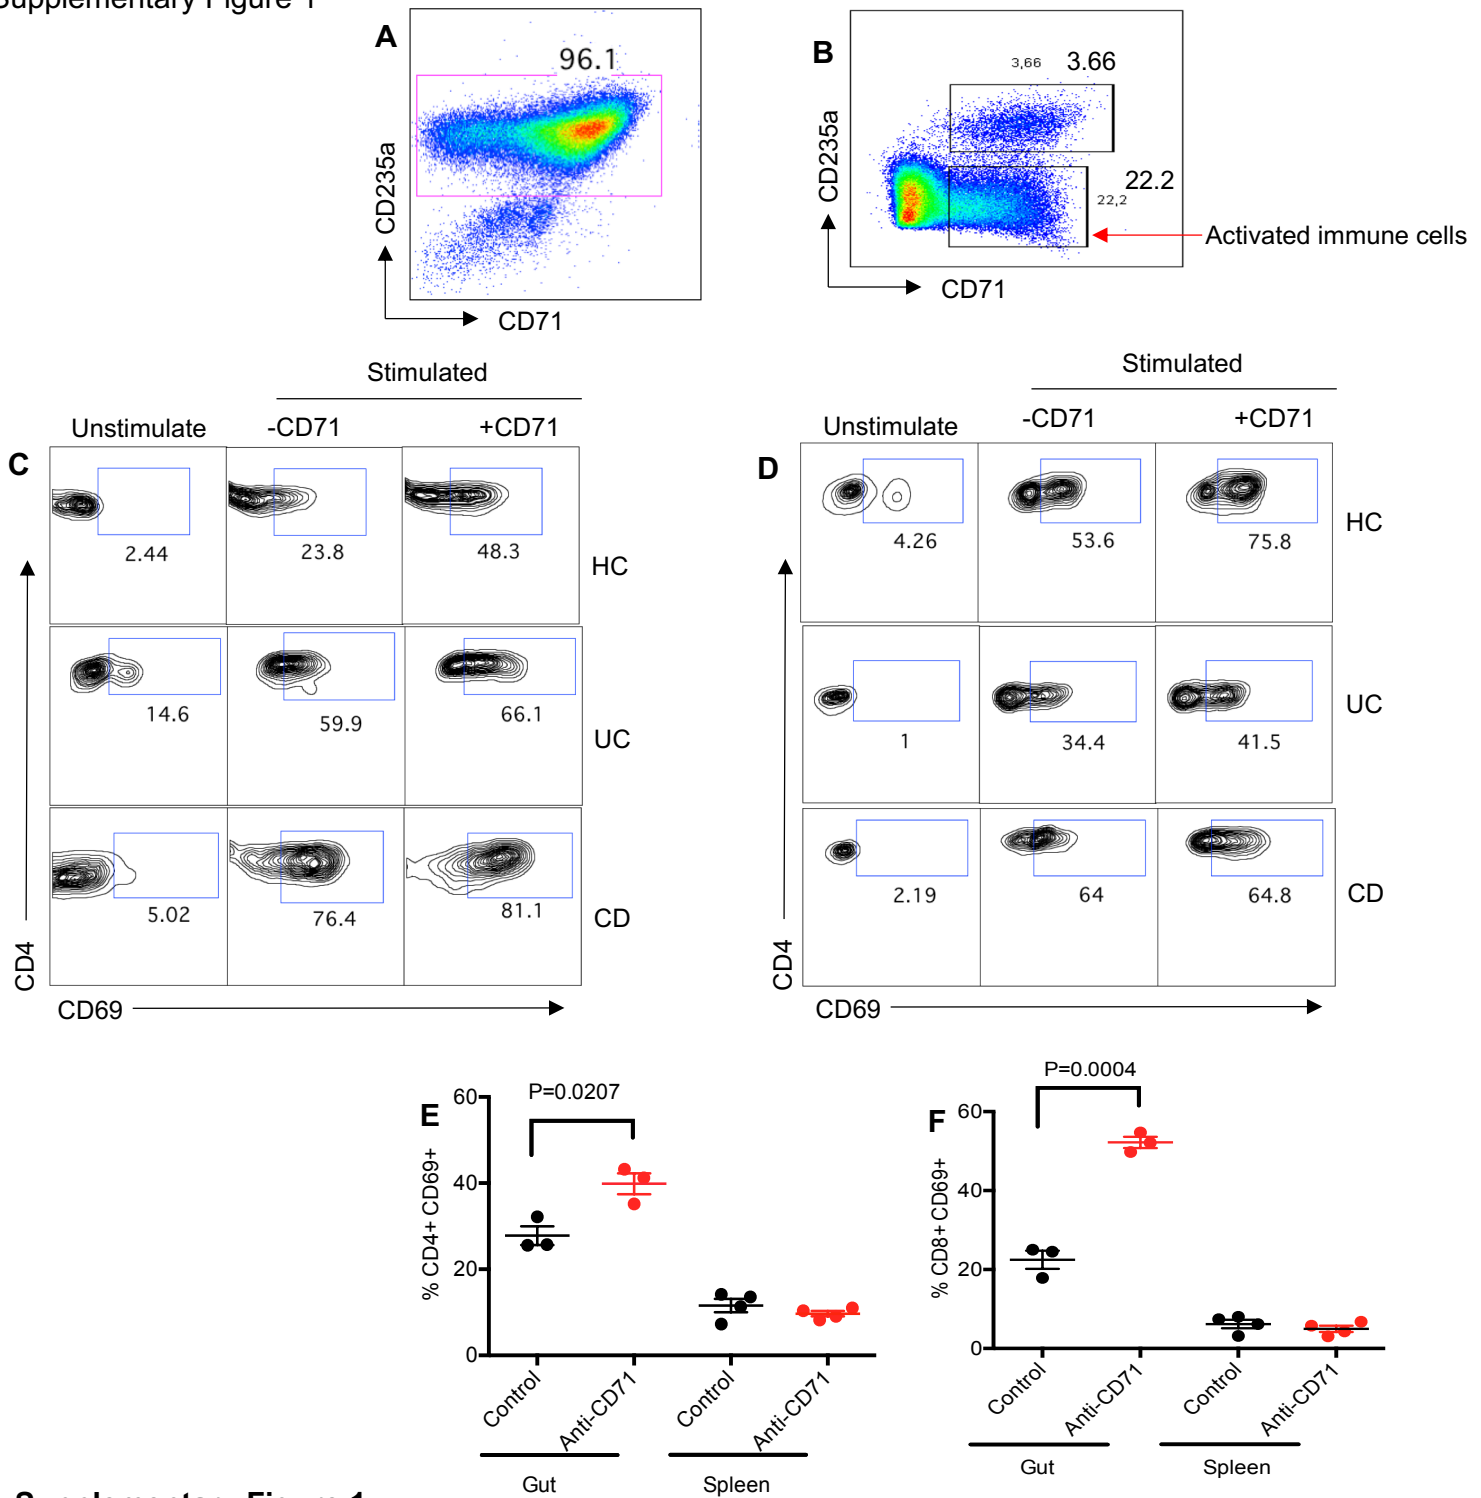

Supplementary Figure 1

[A] Representative dot plots illustrating purity of CD71<sup>+</sup> erythroid cells. [B] Representative dot plot showing percent CD71<sup>+</sup> erythroid cells in cord blood of an infant born to a CD mother following an emergency C-section, also showing % activated immune cells (CD71<sup>+</sup>CD235a<sup>-</sup> cells). [C] Representative zebra plots showing % CD69 expression on CD4 T cells among placenta cells from HC versus UC and CD patients. [D] Representative zebra plots showing % CD69 expression on CD4 T cells among CBMCs of infants born to HC versus UC and CD mothers. [E, F] Data showing percentages of CD4 and CD8 T cells in gut tissues and spleen in control versus treated mice with anti-CD71 antibody, respectively.

Supplementary Figure 2

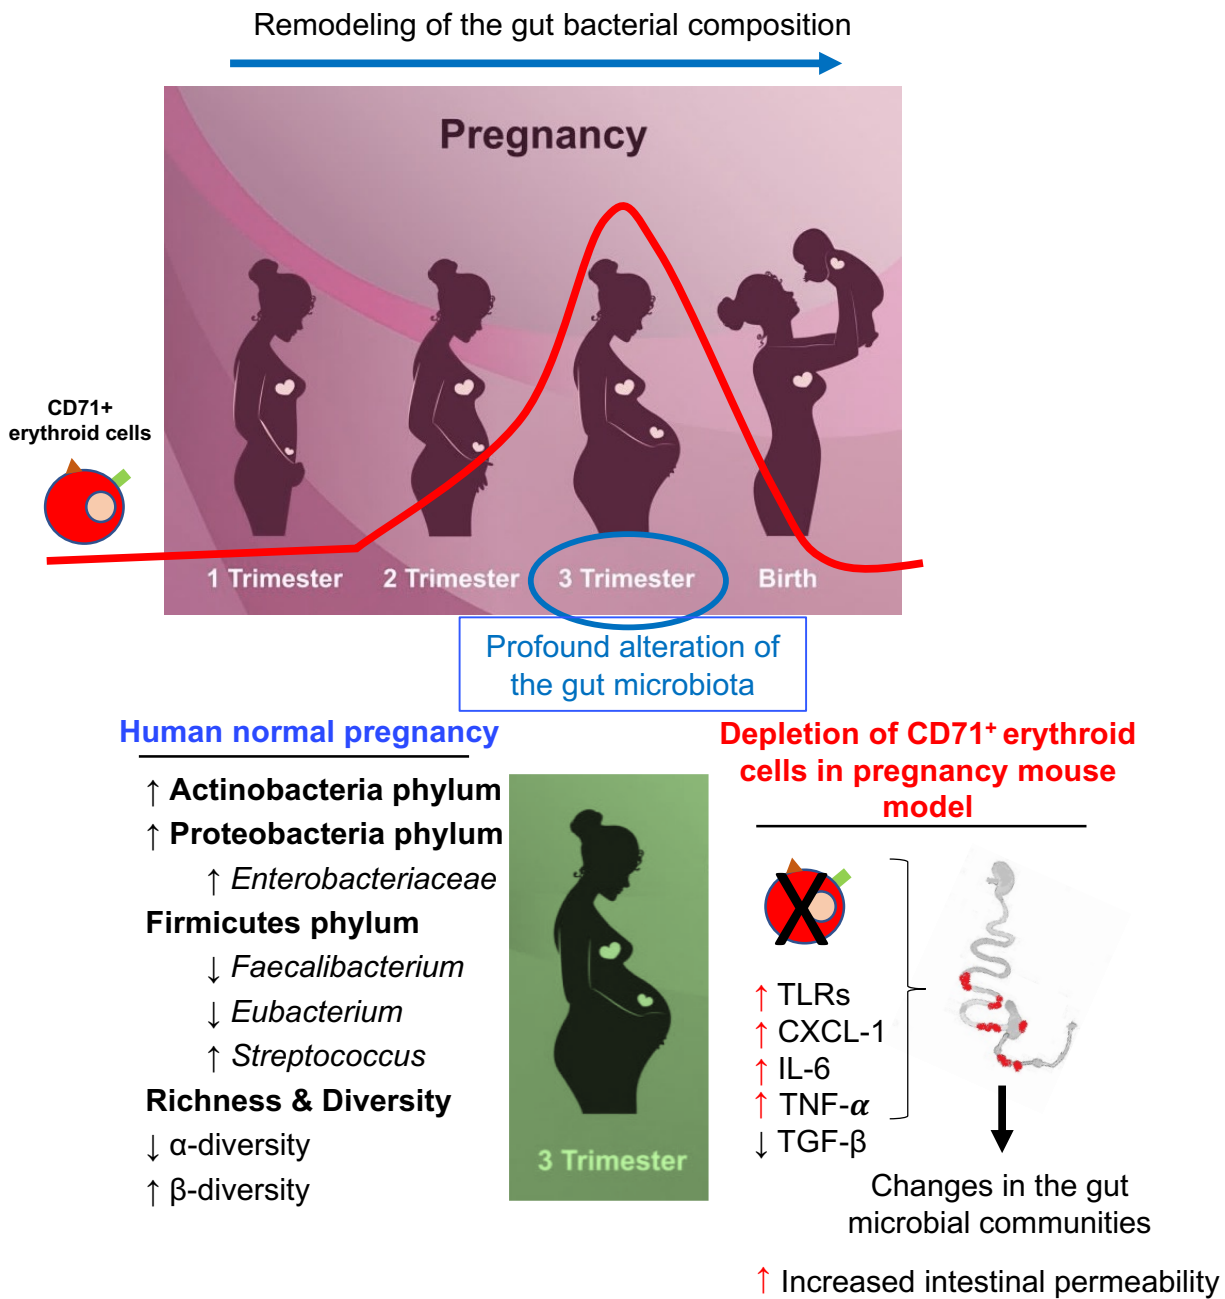

Supplementary Figure 2

CD71<sup>+</sup> erythroid cells expand in the 2<sup>nd</sup> and 3<sup>rd</sup> trimesters of pregnancy. Profound changes of gut microbiota take place at the 3<sup>rd</sup> trimesters which coincides with the expansion of CD71<sup>+</sup> erythroid cells. Depletion of CD71<sup>+</sup> erythroid cells in a mouse model of pregnancy which mimics lower frequency of CD71<sup>+</sup> erythroid cells in IBD patients was associated with pro-inflammatory response as illustrated by upregulation of TLRs, IL-6, TNF- $\alpha$  and CXCL-1 expression and downregulation of TGF- $\beta$  in the gut tissues.

**Supplementary Table 2.** Primers used for microbiota analysis.

| Target bacterial group    | Primers sequence (5'→3')     | Tm (°C) | Amplicon size (bp) | Reference |
|---------------------------|------------------------------|---------|--------------------|-----------|
| Total bacteria            | F: CGGYCCAGACTCCTACGGG       | 63      | 200                | 120       |
|                           | R: TTACCGCGGCTGCTGGCAC       |         |                    |           |
| Bacteroides group         | F: GGTGTCGGCTTAAGTGCCAT      | 60      | 140                | 20        |
|                           | R: CGGAYGTAAGGGCCGTGC        |         |                    |           |
| Lactobacillus group       | F: AGCAGTAGGGAATCTTCCA       | 63      | 341                | 20        |
|                           | R: CACCGCTACACATGGAG         |         |                    |           |
| Enterobacteriaceae family | F: CATTGACGTTACCCGCAGAAGAAGC | 63      | 195                | 20        |
|                           | R: CTCTACGAGACTCAAGCTTGC     |         |                    |           |
| Clostridium cluster I     | F: GTGAAATGCGTAGAGATTAGGAA   | 58      | 665                | 20        |
|                           | R: GATYYGCGATTACTAGYAACTC    |         |                    |           |
| Clostridium cluster IV    | F: GCACAAGCAGTGGAGT          | 60      | 239                | 20        |
|                           | R: CTTCTCCGTTTTGTCAA         |         |                    |           |
| Clostridium cluster XIVa  | F: AAATGACGGTACCTGACTAA      | 58      | 438-441            | 20        |
|                           | R: CTTTGAGTTTCATTCTTGCAGAA   |         |                    |           |
